# Supplementary material for: The relationship between oxidative balance score and erectile dysfunction in the U.S. male adult population
Source: PubMed Central journal article supplement (PMC11087471; doi:10.1038/s41598-024-61287-w), 2024-05-10
Supplement: 41598_2024_61287_MOESM1_ESM.pdf [file 41598_2024_61287_MOESM1_ESM.pdf]

**Supplemental table 1** Oxidative balance score assignment scheme.

| OBS Components                          | Property    | Assignment Scheme *                                                           |
|-----------------------------------------|-------------|-------------------------------------------------------------------------------|
| <b>Dietary components</b>               |             |                                                                               |
| 1. Dietary fiber (g/d)                  | Antioxidant | 0 = low (1st tertile), 1 = intermediate (2nd tertile), 2 = high (3rd tertile) |
| 2. Carotene (RE/d)                      |             |                                                                               |
| 3. Riboflavin (mg/d)                    |             |                                                                               |
| 4. Niacin (mg/d)                        |             |                                                                               |
| 5. Vitamin B6 (mg/d)                    |             |                                                                               |
| 6. Total folate (mcg/d)                 |             |                                                                               |
| 7. Vitamin B12 (mcg/d)                  |             |                                                                               |
| 8. Vitamin C (mg/d)                     |             |                                                                               |
| 9. Vitamin E (ATE) (mg/d)               |             |                                                                               |
| 10. Calcium (mg/d)                      |             |                                                                               |
| 11. Magnesium (mg/d)                    |             |                                                                               |
| 12. Zinc (mg/d)                         |             |                                                                               |
| 13. Copper (mg/d)                       |             |                                                                               |
| 14. Selenium (mcg/d)                    |             |                                                                               |
| 15. Total fat (g/d)                     | Prooxidant  | 0 = high (3rd tertile), 1 = intermediate (2nd tertile), 2 = low (1st tertile) |
| 16. Iron (mg/d)                         |             |                                                                               |
| <b>Lifestyle components</b>             |             |                                                                               |
| 17. Physical activity (MET-minute/week) | Antioxidant | 0 = low (< 400), 1 = intermediate (400 –1000), 2 = high (>1000)               |
| 18. Alcohol (g/d)                       | Prooxidant  | 0 = high (> 30), 1 = intermediate (0 – 30), 2 = low (None)                    |
| 19. BMI (kg/m <sup>2</sup> )            |             | 0 = high (> 30), 1 = intermediate (25 – 30), 2 = low (< 25)                   |
| 20. Cotinine (ng/mL)                    |             | 0 = high (> 0.038), 1 = intermediate (0.038 – 1.13), 2 = low (< 1.13)         |

BMI: body measurement index.
